# Supplementary material for: In situ synthesis of gold nanoparticles on LBL coated nanofibers by tannic acid for catalytic application
Source: Royal Society of Chemistry journal article supplement (doi:10.1039/c5ra01483b), 2015-01-01
Supplement: c5ra01483b1.pdf [file c5ra01483b1.pdf]

**Supplementary information:**

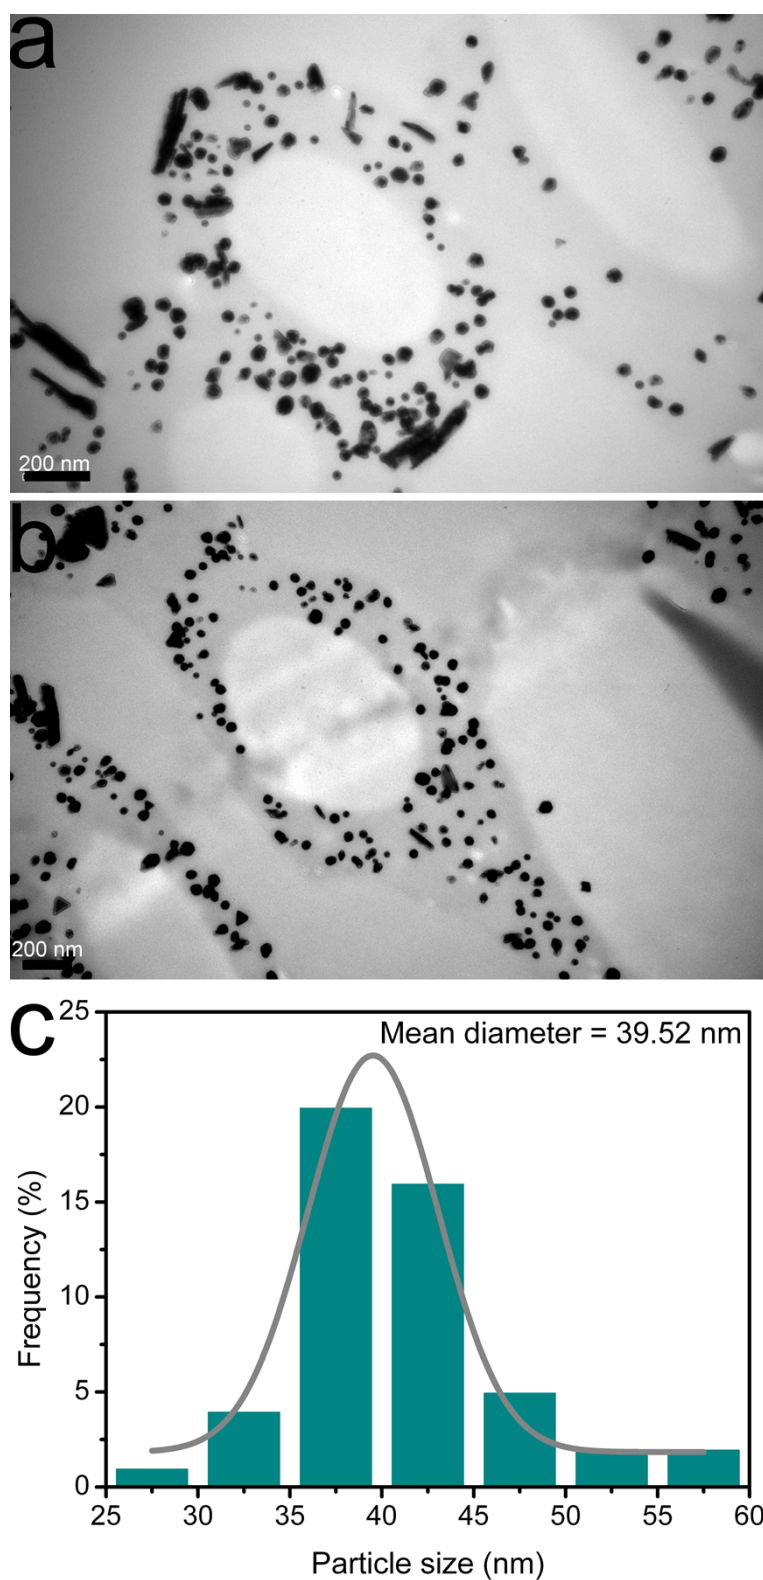

Figure S1. Cross-sectional TEM images of AuNPs-immobilized nanofibers with different magnification (reduced in 5mM  $\text{HAuCl}_4$  solution) (a, b); the particle size distribution histogram (c)
